# Supplementary material for: Thickness-Dependent Photocatalysis of Ultra-Thin MoS2 Film for Visible-Light-Driven CO2 Reduction
Source: MDPI journal article supplement (doi:10.3390/catal11111295), 2021-10-27
Supplement: s1 [file s1]

Supplementary material

# Thickness-Dependent Photocatalysis of Ultra-Thin MoS<sub>2</sub> Film for Visible-Light-Driven CO<sub>2</sub> Reduction

Yi-Fan Huang <sup>1,†</sup>, Kuan-Wei Liao <sup>2,3,†</sup>, Fariz Rifqi Zul Fahmi <sup>2,4,†</sup>, Varad A. Modak <sup>1,5,6</sup>, Shang-Hsuan Tsai <sup>2,4</sup>, Shang-Wei Ke <sup>2,3</sup>, Chen-Hao Wang <sup>4</sup>, Li-Chyong Chen <sup>2,7,\*</sup> and Kuei-Hsien Chen <sup>1,2,3,\*</sup>

- <sup>1</sup> Institute of Atomic and Molecular Sciences, Academia Sinica, Taipei 10617, Taiwan; yifanhuang1979@gmail.com (Y.-F.H.); vmodak97@gmail.com (V.A.M.)
  - <sup>2</sup> Center for Condensed Matter Sciences, National Taiwan University, Taipei 10617, Taiwan; fly1299sky@gmail.com (K.-W.L.); farizrifqi49@gmail.com (F.R.Z.F.); danny458962@gmail.com (S.-H.T.); qazasdfgh28@gmail.com (S.-W.K.)
  - <sup>3</sup> Department of Chemistry, National Taiwan Normal University, Taipei 11677, Taiwan
  - <sup>4</sup> Department of Materials Science and Engineering, National Taiwan University of Science and Technology, Taipei 10617, Taiwan; chwang@mail.ntust.edu.tw
  - <sup>5</sup> International Graduate Program of Molecular Science and Technology, National Taiwan University (NTU-MST), Taipei 10617, Taiwan
  - <sup>6</sup> Molecular Science and Technology Program, Taiwan International Graduate Program (TIGP), Academia Sinica, Taipei 11529, Taiwan
  - <sup>7</sup> Center of Atomic Initiative for New Materials, National Taiwan University, Taipei 10617, Taiwan
- \* Correspondence: chenlc@ntu.edu.tw (L.-C.C.); chenkh@pub.iam.s.sinica.edu.tw (K.-H.C.)
- † These authors contributed equally.

**Citation:** Huang, Y.-F.; Liao, K.-W.; Fahmi, F.R.Z.; Modak, V.A.; Tsai, S.-H.; Ke, S.-W.; Wang, C.-H.; Chen, L.-C.; Chen, K.-H. Thickness-Dependent Photocatalysis of Ultra-Thin MoS<sub>2</sub> Film for Visible-Light-Driven CO<sub>2</sub> Reduction. *Catalysts* **2021**, *11*, 1295. <https://doi.org/10.3390/catal11111295>

Academic Editors: Tilak Das and Dhanya Puthusseri

Received: 30 September 2021

Accepted: 25 October 2021

Published: 27 October 2021

**Publisher's Note:** MDPI stays neutral with regard to jurisdictional claims in published maps and institutional affiliations.

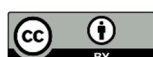

**Copyright:** © 2021 by the authors. Licensee MDPI, Basel, Switzerland. This article is an open access article distributed under the terms and conditions of the Creative Commons Attribution (CC BY) license (<http://creativecommons.org/licenses/by/4.0/>).

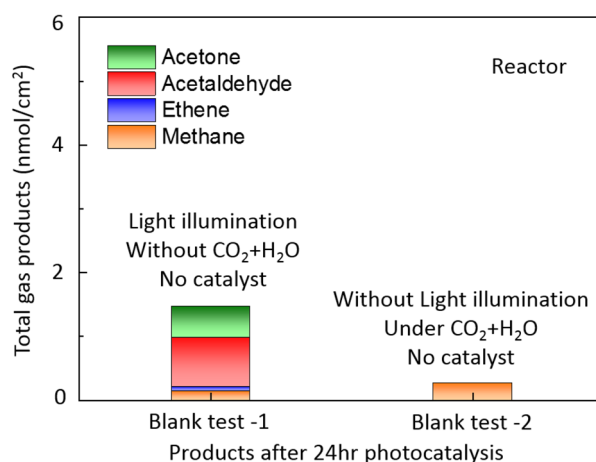

**Figure S1.** The total gas products of two kinds of blank test conditions for photocatalysis: 1.47 nmol/cm<sup>2</sup> for blank test-1 and 0.27 nmol/cm<sup>2</sup> for blank test-2, respectively.

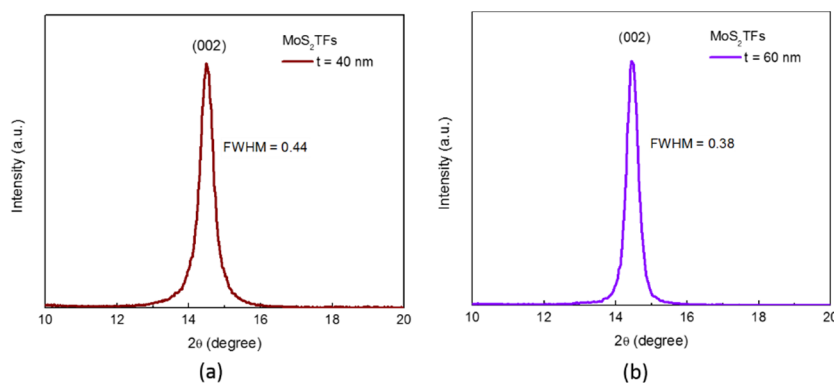

**Figure S2.** XRD pattern of the MoS<sub>2</sub>TFs on sapphire with different thicknesses: (a) *t* = 40 nm and (b) *t* = 60 nm.

**Table S1.** The calculated grain size of MoS<sub>2</sub>TFs on sapphire from (002) peak using Scherrer's formula.

| Thickness (nm) | $\beta$ /degree | $2\theta$ /degree | D/nm  |
|----------------|-----------------|-------------------|-------|
| 40             | 0.44            | 14.49             | 18.22 |
| 60             | 0.38            | 14.47             | 21.10 |

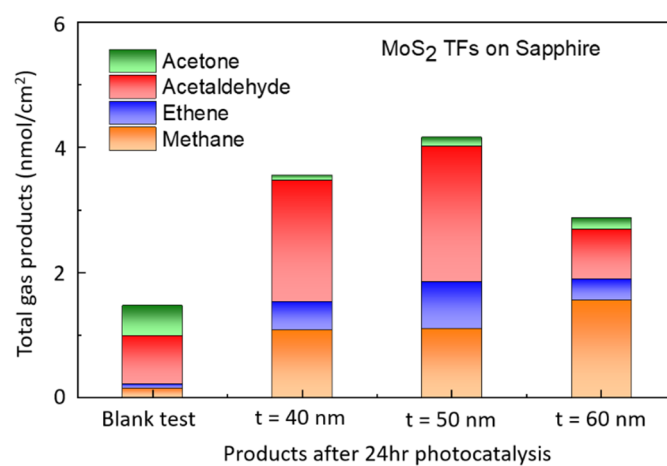**Figure S3.** The PC-CO<sub>2</sub>RR activity of MoS<sub>2</sub>TFs on sapphire with thickness increasing from 40 to 60 nm.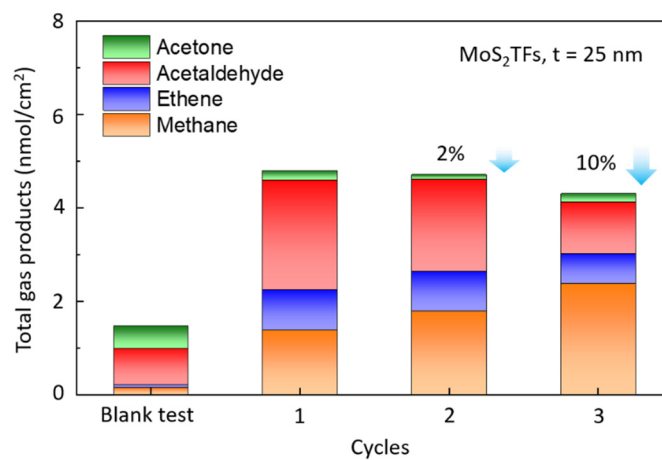**Figure S4.** The stability study of the photocatalytic CO<sub>2</sub> reduction over the MoS<sub>2</sub>TFs with 25 nm thickness.
